# Supplementary material for: Rational Use of Danofloxacin for Treatment of Mycoplasma gallisepticum in Chickens Based on the Clinical Breakpoint and Lung Microbiota Shift
Source: MDPI journal article supplement (doi:10.3390/antibiotics11030403), 2022-03-17
Supplement: s1 [file s1]

## Article

# Rational Use of Danofloxacin for Treatment of *Mycoplasma Gallisepticum* in Chickens Based on the Clinical Breakpoint and Lung Microbiota Shift

Shuge Wang <sup>1,2,3</sup>, Anxiong Huang <sup>1,2</sup>, Yufeng Gu <sup>1,2</sup>, Jun Li <sup>4</sup>, Lingli Huang <sup>1,2</sup>, Xu Wang <sup>1,2</sup>, Yanfei Tao <sup>1,2</sup>, Zhenli Liu <sup>1,2</sup>, Congming Wu <sup>3</sup>, Zonghui Yuan <sup>1,2</sup> and Haihong Hao <sup>1,2,\*</sup>

<sup>1</sup> National Reference Laboratory of Veterinary Drug Residues (HZAU) and MAO Key Laboratory for Detection of Veterinary Drug Residues, Wuhan 430070, China; shugewang@webmail.hzau.edu.cn (S.W.); anxionghuang@webmail.hzau.edu.cn (A.H.); guyufeng@webmail.hzau.edu.cn (Y.G.); huanglingli@mail.hzau.edu.cn (L.H.); wangxu@mail.hzau.edu.cn (X.W.); tyf@mail.hzau.edu.cn (Y.T.); liuzhli009@mail.hzau.edu.cn (Z.L.); yuan5802@mail.hzau.edu.cn (Z.Y.)

<sup>2</sup> MOA Laboratory for Risk Assessment of Quality and Safety of Livestock and Poultry Products, Wuhan 430070, China

<sup>3</sup> National Center for Veterinary Drug Safety Evaluation, College of Veterinary Medicine, China Agricultural University, Beijing 100193, China; wucm@cau.edu.cn

<sup>4</sup> Institute of Food Safety and Nutrition, Jiangsu Academy of Agricultural Sciences, Nanjing 210000, China; lijunjaas@126.com

\* Correspondence: haohaihong@mail.hzau.edu.cn; Tel.: +0086-27-87287186; Fax: 0086-27-87672232

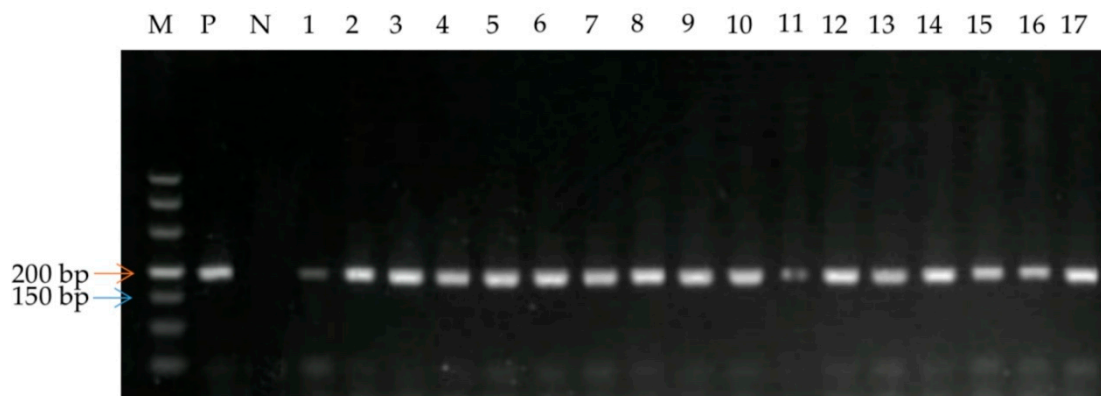

**Figure S1.** Electropherogram of PCR products of MG

Note: M is DL1000 DNA Marker, the band from the top to the bottom is 500 bp, 400 bp, 300 bp, 200 bp, 150 bp, 100 bp, 50 bp; “P” was positive control; “N” was negative control, “1-17” were samples.

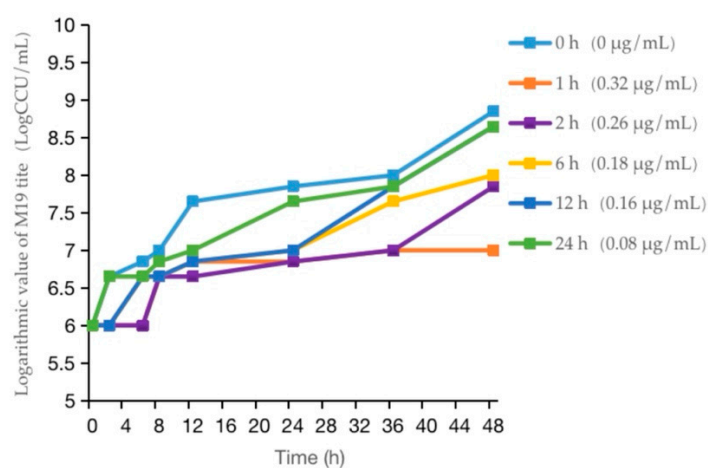

**Figure S2.** *Ex vivo* curves of danofloxacin against M19 in the healthy plasma.

Note: The value in brackets is the drug concentration measured by HPLC at the corresponding sampling time point.

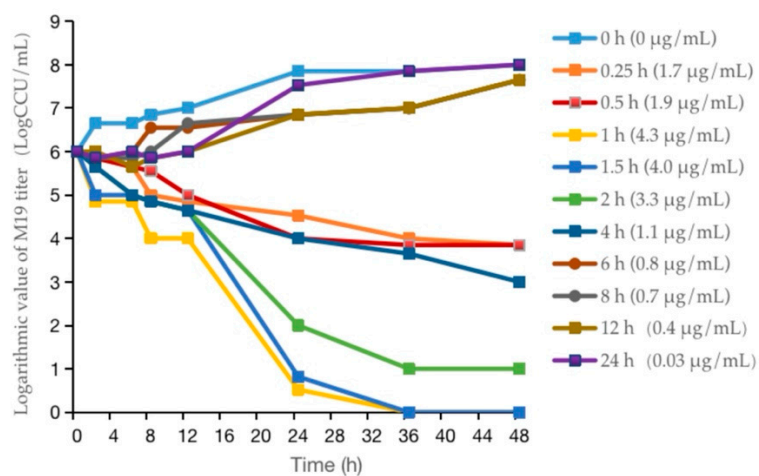

**Figure S3.** *Ex vivo* killing-time curves of danofloxacin against M19 in healthy lung tissue.

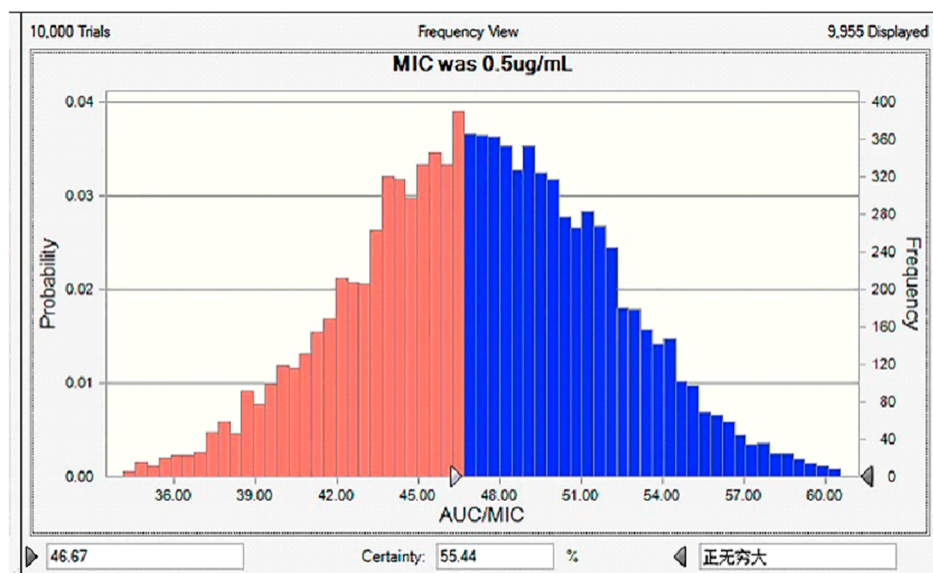

**Figure S4.** Probability of danofloxacin against MG in lung at 0.5 µg/mL

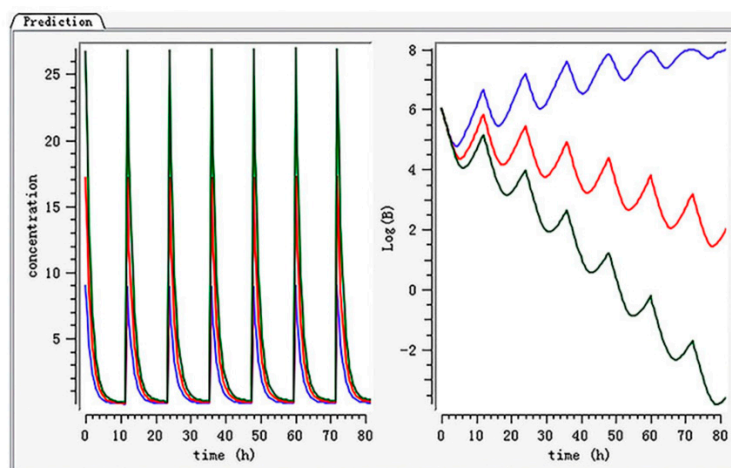

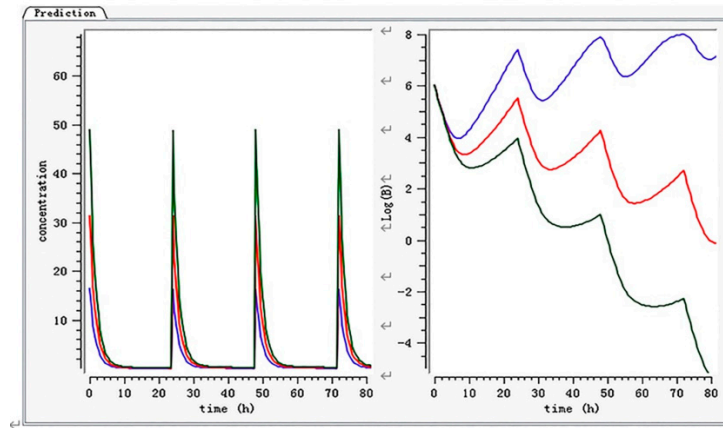

**Figure S5.** The growth of bacteria under different drug regimens by Mlxplora simulation

Note: Figure S5A: Blue lines represent prevent dosage (4.46 mg/kg twice a day); Red lines represent therapeutic dosage (8.80 mg/kg twice a day); Green lines represent eradicate dosage (10.37 mg/kg twice a day); Figure S5B: Blue lines represent prevent dosage (8.93 mg/kg once a day); Red lines represent therapeutic dosage (16.60 mg/kg once a day); Green lines represent eradicate dosage (20.74 mg/kg once a day).

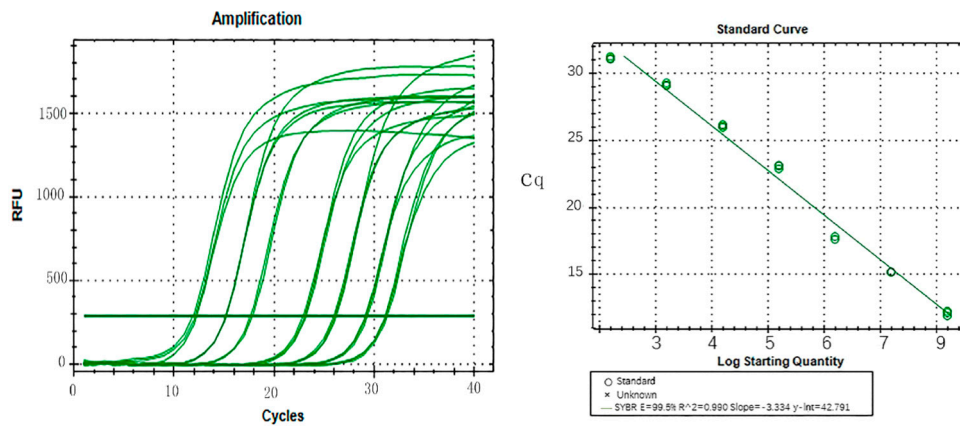

**Figure S6.** Dynamic curve and standard curve of recombinant plasmid (Left: amplification curve, Right: standard curve).

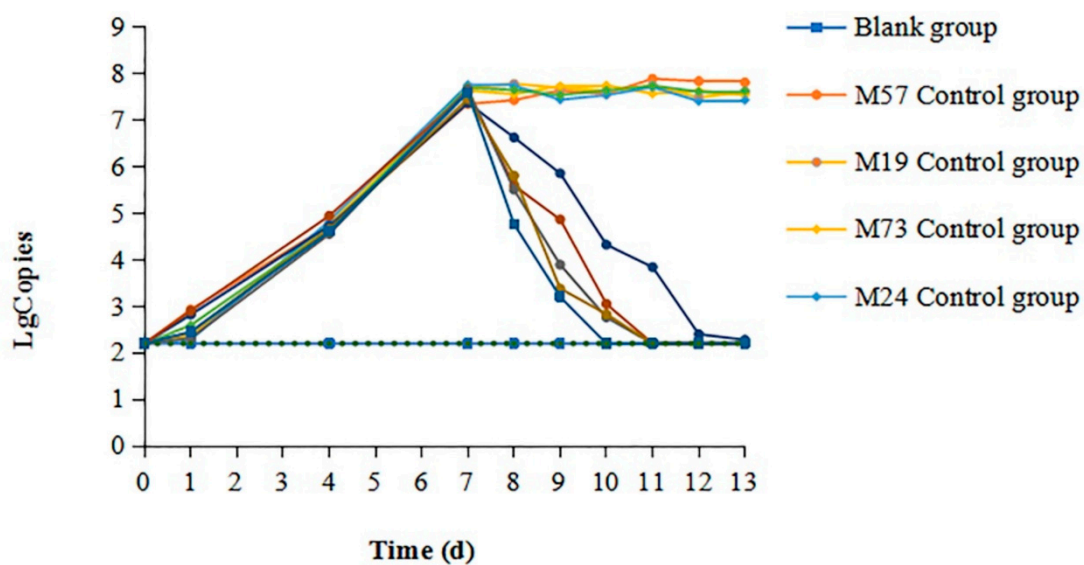

**Figure S7.** Logarithmic change of MG copy number during the test.

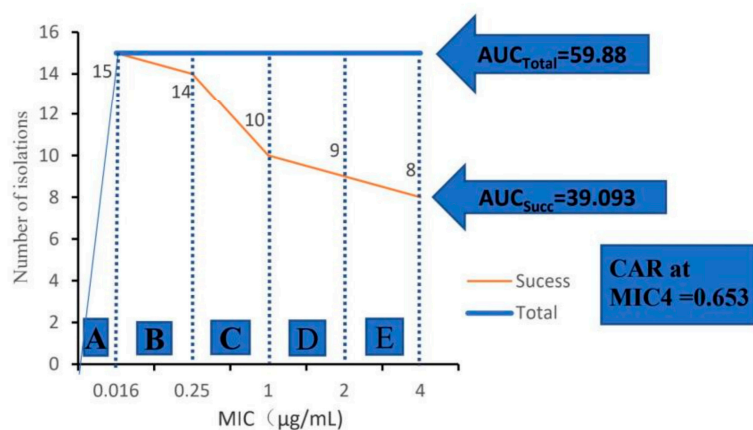

**Figure S8.** Graphic illustration of the CAR method.

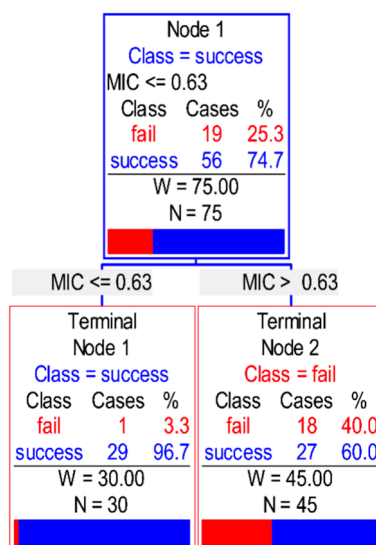

**Figure S9.** The results of the CART model.

Note: CART uses the Gini coefficient minimization criterion to automatically select nodes to segment the MIC and generate a regression tree. The selected node was MIC=0.63  $\mu\text{g/mL}$ .

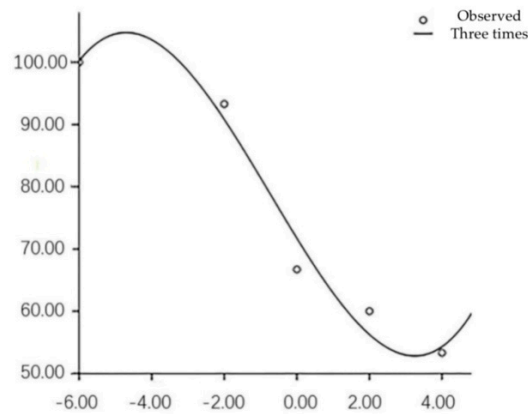

**Figure S10.** Non-linear regression simulation of Log<sub>2</sub>MIC and POC

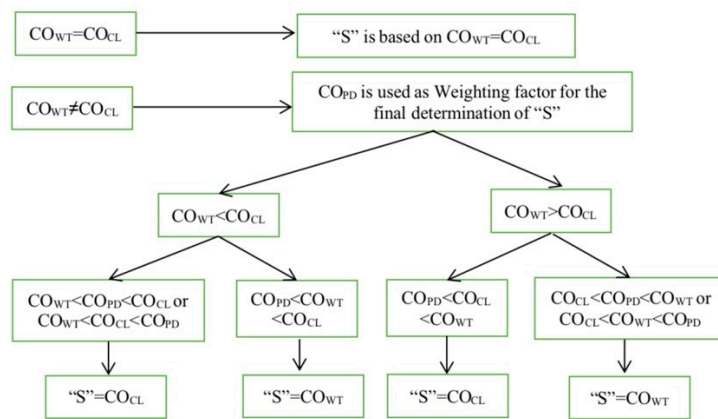

**Figure S11.** Susceptibility breakpoint decision tree

Table S1. The virulence test results of *MG* in embryo

| Number | Death/Total | Positive/Total | Infection Rate | Death Rate |
|--------|-------------|----------------|----------------|------------|
| M3     | 3/10        | 10/10          | 100%           | 30%        |
| M19    | 10/10       | 10/10          | 100%           | 100%       |
| M29    | 6/10        | 10/10          | 100%           | 60%        |
| M38    | 4/10        | 10/10          | 100%           | 40%        |
| M41    | 1/10        | 10/10          | 100%           | 10%        |
| M58    | 3/10        | 10/10          | 100%           | 30%        |
| M77    | 5/10        | 10/10          | 100%           | 50%        |
| M83    | 2/10        | 10/10          | 100%           | 20%        |
| M98    | 8/10        | 10/10          | 100%           | 80%        |
| M100   | 5/10        | 10/10          | 100%           | 50%        |
| M107   | 4/10        | 10/10          | 100%           | 40%        |

Table S2. Results of Ecoffinder simulation for danofloxacin against *MG*

| Parameter                      | Fitted Value  |
|--------------------------------|---------------|
| MIC range                      | 0.008-8 µg/mL |
| MIC <sub>50</sub>              | 1 µg/mL       |
| MIC <sub>90</sub>              | 2 µg/mL       |
| Selected Subset                | ≤4 µg/mL      |
| Modal MIC                      | 0.25          |
| Log <sub>2</sub> MIC Mode      | -2            |
| Max Log <sub>2</sub> MIC       | 3             |
| Selected Log <sub>2</sub> Mean | -2            |
| Selected Log <sub>2</sub> SD   | 1             |
| 95.0% Subset ECOFFs            | 1 µg/mL       |
| 97.5% Subset ECOFFs            | 1 µg/mL       |
| 99.0% Subset ECOFFs            | 2 µg/mL       |
| 99.5% Subset ECOFFs            | 2 µg/mL       |
| 99.9% Subset ECOFFs            | 4 µg/mL       |

Note: Selected Subset was the optimal fitting range by nonlinear regression; and Modal MIC was the highest MIC distribution.

Table S3. Drug concentration in chicken plasma and lung tissues at different time points after administration of danofloxacin(5 mg/kg) (n = 5)

| Sampling Time (h) | Drug Concentration (µg/mL) |                |               |                |
|-------------------|----------------------------|----------------|---------------|----------------|
|                   | Plasma                     |                | Lung Tissue   |                |
|                   | Healthy Group              | Diseased Group | Healthy Group | Diseased Group |
| 0                 | 0                          | 0              | 0             | 0              |
| 0.25              | 0.20 ± 0.03                | 0.16 ± 0.04    | 1.70 ± 0.03   | 1.90 ± 0.08    |
| 0.5               | 0.30 ± 0.03                | 0.18 ± 0.03    | 1.90 ± 0.03   | 2.10 ± 0.11    |
| 1                 | 0.32 ± 0.04                | 0.28 ± 0.06    | 4.30 ± 0.30   | 4.70 ± 0.10    |
| 1.5               | 0.27 ± 0.04                | 0.23 ± 0.03    | 4.00 ± 0.30   | 4.30 ± 0.11    |
| 2                 | 0.26 ± 0.04                | 0.19 ± 0.03    | 3.30 ± 0.12   | 3.60 ± 0.13    |
| 3                 | 0.23 ± 0.04                | 0.18 ± 0.03    | 2.60 ± 0.22   | 2.90 ± 0.15    |
| 4                 | 0.22 ± 0.02                | 0.16 ± 0.03    | 1.10 ± 0.16   | 1.30 ± 0.17    |
| 6                 | 0.18 ± 0.04                | 0.14 ± 0.05    | 0.80 ± 0.06   | 1.10 ± 0.10    |
| 8                 | 0.17 ± 0.03                | 0.13 ± 0.04    | 0.70 ± 0.07   | 0.80 ± 0.11    |
| 12                | 0.15 ± 0.04                | 0.11 ± 0.02    | 0.40 ± 0.07   | 0.40 ± 0.06    |
| 24                | 0.08 ± 0.03                | 0.09 ± 0.04    | 0.03 ± 0.004  | 0.04 ± 0.008   |
| 36                | ND                         | ND             | ND            | ND             |
| 48                | ND                         | ND             | ND            | ND             |

Note: “ND” is not detected.

Table S4. The different dosages for three level of target effects

| Antibacterial Effect   | Weight Dose (mg/kg b.w) | Feeding Dose (mg/kg) |
|------------------------|-------------------------|----------------------|
| Bacteriostatic (E = 0) | 8.93                    | 90                   |
| Bactericidal (E = -3)  | 16.60                   | 170                  |
| Eradication (E = -4)   | 20.74                   | 200                  |

Table S5. Community metrics (Chao 1, Simpson and Shannon indices) of the four groups.

| Group | Richness Index | Diversity Indices |         |
|-------|----------------|-------------------|---------|
|       | Chao1          | Simpson           | Shannon |
| HWK   | 2322.95        | 0.97              | 7.59    |
| GW    | 1552.17        | 0.96              | 6.64    |
| ZW    | 1744.61        | 0.96              | 6.52    |
| ZHW   | 1094.55        | 0.88              | 5.18    |
